# Supplementary material for: Development of job demands, decision authority and social support in industries with different gender composition – Sweden, 1991–2013
Source: Springer Nature journal article supplement (doi:10.1186/s12889-019-6917-8), 2019-06-14
Supplement: MOESM1 [file 16813890]

Additional file 1: Response rates by year of SWES

| <b>Year of SWES</b> | <b>Number of eligible participants</b> | <b>Number of respondents</b> | <b>Response rate</b> |
|---------------------|----------------------------------------|------------------------------|----------------------|
| 1991                | 14,300                                 | 12,462                       | 87.15%               |
| 1993                | 13,291                                 | 11,709                       | 88.10%               |
| 1995                | 13,173                                 | 10,830                       | 82.21%               |
| 1997                | 12,798                                 | 10,400                       | 81.26%               |
| 1999                | 12,546                                 | 9,734                        | 77.59%               |
| 2001                | 12,911                                 | 9,542                        | 73.91%               |
| 2003                | 12,372                                 | 9,115                        | 73.67%               |
| 2005                | 13,541                                 | 9,579                        | 70.74%               |
| 2007                | 10,680                                 | 7,615                        | 71.30%               |
| 2009                | 9,159                                  | 6,239                        | 68.12%               |
| 2011                | 123,88                                 | 7,784                        | 62.84%               |
| 2013                | 8,135                                  | 4,689                        | 57.64%               |
