# Supplementary material for: Development of job demands, decision authority and social support in industries with different gender composition – Sweden, 1991–2013
Source: Springer Nature journal article supplement (doi:10.1186/s12889-019-6917-8), 2019-06-14
Supplement: MOESM2 [file 16813890]

## **Additional file 2: Composition of the study outcome variables**

The composition of each of the outcome variables used in the article are described below, and includes the original response items for each item.

### *Job demands*

- Do you sometimes have so much work to do that you have to skip lunch, work late, or take work home with you?
  - Everyday
  - A couple of days a week (1 of 2 days)
  - One day a week (1 day of 5)
  - A couple of days a month (1 day of 10)
  - Not at all/seldom in the last 3 months
  
- Is your work sometimes so stressful that you do not have time to talk or even think of anything other than work?
  - Nearly all the time
  - Roughly  $\frac{3}{4}$  of the time
  - Half of the time
  - Roughly  $\frac{1}{4}$  of the time
  - Some (perhaps 1/10 of the time)
  - No, not at all
  
- Does your work require your undivided attention and concentration?
  - Nearly all the time
  - Roughly  $\frac{3}{4}$  of the time
  - Half of the time
  - Roughly  $\frac{1}{4}$  of the time
  - Some (perhaps 1/10 of the time)
  - No, not at all
  
- How do you experience your work?
  - Likert scale with 5 response items, going from 1 (far too much to do) to 5 (far too little to do)

### *Decision authority*

- Is it possible for you to set your own work tempo?
  - Nearly all the time
  - Roughly  $\frac{3}{4}$  of the time
  - Half of the time
  - Roughly  $\frac{1}{4}$  of the time
  - Some (perhaps 1/10 of the time)
  - No, not at all

- Is it possible for you to decide on your own when various tasks are to be done (for example, by choosing to work a bit faster some days and taking it easy other days)?
  - Always
  - Mostly
  - Mostly not
  - Never
  
- Are you involved in planning your work (for example, what is to be done, how it is to be done, or who is to work with you)?
  - Always
  - Mostly
  - Mostly not
  - Never
  
- How do you experience your work?
  - Likert scale with 5 response items, varying from 1 (too little influence) to 5 (too much influence)

### *Social support*

- Can you receive support and encouragement from your superiors when your work becomes troublesome?
  - Always
  - Mostly
  - Mostly not
  - Never
  
- Can you receive support and encouragement from your fellow workers when your work becomes troublesome?
  - Always
  - Mostly
  - Mostly not
  - Never
