# Supplementary material for: Development of job demands, decision authority and social support in industries with different gender composition – Sweden, 1991–2013
Source: Springer Nature journal article supplement (doi:10.1186/s12889-019-6917-8), 2019-06-14
Supplement: MOESM3 [file 16813890]

Additional file 3. Proportion of women exposed to each psychosocial work factor in each wave by industry

|                        | Edu   | HSC   | LIS   | KIS   | PA    | GEP   | MO    |
|------------------------|-------|-------|-------|-------|-------|-------|-------|
| <hr/>                  |       |       |       |       |       |       |       |
| High job demands       | <hr/> |       |       |       |       |       |       |
| 1991                   | 56.1% | 43.5% | 48.6% | 48.8% | 53.0% | 36.8% | 44.7% |
| 1993                   | 60.6% | 49.3% | 47.9% | 49.8% | 51.6% | 43.9% | 50.3% |
| 1995                   | 66.4% | 55.8% | 50.4% | 51.4% | 51.9% | 41.2% | 53.3% |
| 1997                   | 71.2% | 59.9% | 55.2% | 53.5% | 59.2% | 47.3% | 52.5% |
| 1999                   | 69.4% | 59.8% | 60.2% | 56.0% | 57.0% | 52.1% | 55.7% |
| 2001                   | 70.9% | 57.0% | 51.2% | 48.9% | 58.1% | 43.1% | 50.5% |
| 2003                   | 63.4% | 55.1% | 52.1% | 51.2% | 57.6% | 46.8% | 50.7% |
| 2005                   | 69.1% | 56.1% | 54.9% | 51.4% | 57.4% | 45.9% | 46.0% |
| 2007                   | 68.1% | 58.5% | 55.5% | 52.9% | 53.2% | 52.0% | 46.2% |
| 2009                   | 71.7% | 59.2% | 51.9% | 49.9% | 51.0% | 43.9% | 55.6% |
| 2011                   | 71.2% | 57.9% | 50.6% | 50.5% | 57.4% | 47.4% | 51.9% |
| 2013                   | 70.6% | 60.6% | 52.5% | 56.9% | 58.7% | 52.8% | 51.4% |
| <hr/>                  |       |       |       |       |       |       |       |
| Low decision authority | <hr/> |       |       |       |       |       |       |
| 1991                   | 44.1% | 53.8% | 50.7% | 39.9% | 38.3% | 48.5% | 52.8% |
| 1993                   | 43.7% | 55.3% | 49.8% | 46.2% | 36.9% | 51.3% | 55.5% |
| 1995                   | 49.7% | 58.1% | 50.8% | 42.7% | 35.9% | 46.9% | 50.7% |
| 1997                   | 56.2% | 62.3% | 54.4% | 41.6% | 38.7% | 49.2% | 51.2% |
| 1999                   | 58.9% | 62.7% | 50.6% | 43.0% | 40.4% | 51.3% | 63.8% |
| 2001                   | 57.0% | 63.1% | 52.1% | 36.2% | 41.3% | 51.4% | 56.4% |
| 2003                   | 52.5% | 59.0% | 49.2% | 39.7% | 38.7% | 42.9% | 46.4% |
| 2005                   | 59.7% | 63.4% | 53.0% | 36.6% | 44.1% | 50.8% | 53.1% |
| 2007                   | 61.5% | 62.8% | 53.8% | 43.8% | 42.5% | 46.4% | 53.5% |
| 2009                   | 60.1% | 63.4% | 50.8% | 33.8% | 41.3% | 46.5% | 47.3% |
| 2011                   | 58.4% | 60.9% | 46.4% | 31.3% | 43.8% | 40.9% | 44.6% |

|                     |      |       |       |       |       |       |       |       |
|---------------------|------|-------|-------|-------|-------|-------|-------|-------|
|                     | 2013 | 60.2% | 67.7% | 47.4% | 40.9% | 35.6% | 46.9% | 43.2% |
| <hr/>               |      |       |       |       |       |       |       |       |
| Poor social support |      |       |       |       |       |       |       |       |
|                     | 1991 | 32.2% | 29.4% | 31.1% | 34.0% | 35.0% | 33.1% | 35.7% |
|                     | 1993 | 32.5% | 29.8% | 34.3% | 31.1% | 33.7% | 34.4% | 35.8% |
|                     | 1995 | 34.2% | 34.9% | 31.2% | 33.6% | 37.5% | 36.4% | 35.7% |
|                     | 1997 | 38.4% | 35.0% | 34.2% | 34.8% | 36.0% | 38.5% | 34.9% |
|                     | 1999 | 38.2% | 34.5% | 35.3% | 36.8% | 39.5% | 35.8% | 43.6% |
|                     | 2001 | 36.8% | 37.3% | 36.0% | 30.6% | 37.6% | 37.1% | 38.1% |
|                     | 2003 | 35.4% | 35.1% | 34.8% | 35.1% | 35.6% | 35.6% | 31.5% |
|                     | 2005 | 37.9% | 37.2% | 41.1% | 38.8% | 35.1% | 41.0% | 37.7% |
|                     | 2007 | 33.9% | 37.6% | 38.1% | 34.6% | 31.2% | 36.2% | 35.2% |
|                     | 2009 | 35.3% | 32.0% | 38.2% | 30.9% | 24.6% | 36.1% | 36.9% |
|                     | 2011 | 35.1% | 34.4% | 36.1% | 33.1% | 33.0% | 28.8% | 36.7% |
|                     | 2013 | 36.6% | 36.5% | 37.6% | 36.5% | 33.2% | 37.4% | 52.6% |

**Legend:**

Edu: Education; HSC: Health and social care; LIS: Labour intensive services; KIS: Knowledge intensive services; PA: Public administration; GEP: Goods and energy production; MO: Machinery operations.

Female-dominated industries: Edu, HSC

Gender mixed industries: LIS, KIS; PA

Male-dominated industries: GEP, MO
