# Supplementary material for: Development of job demands, decision authority and social support in industries with different gender composition – Sweden, 1991–2013
Source: Springer Nature journal article supplement (doi:10.1186/s12889-019-6917-8), 2019-06-14
Supplement: MOESM4 [file 16813890]

Additional file 4. Proportion of men exposed to each psychosocial work factor in each wave by industry

|                        | Edu   | HSC   | LIS   | KIS   | PA    | GEP   | MO    |
|------------------------|-------|-------|-------|-------|-------|-------|-------|
| <hr/>                  |       |       |       |       |       |       |       |
| High job demands       |       |       |       |       |       |       |       |
| 1991                   | 58.4% | 51.3% | 52.6% | 52.1% | 43.7% | 37.1% | 42.0% |
| 1993                   | 63.3% | 51.0% | 55.6% | 53.3% | 45.6% | 46.6% | 46.3% |
| 1995                   | 66.1% | 52.7% | 54.2% | 60.2% | 49.7% | 47.2% | 48.9% |
| 1997                   | 66.3% | 54.0% | 60.8% | 59.4% | 52.8% | 48.3% | 51.8% |
| 1999                   | 73.1% | 56.8% | 57.4% | 57.1% | 49.0% | 47.7% | 56.3% |
| 2001                   | 63.9% | 53.7% | 52.9% | 54.6% | 48.0% | 45.6% | 50.5% |
| 2003                   | 57.1% | 48.9% | 51.1% | 51.0% | 47.0% | 41.9% | 51.6% |
| 2005                   | 56.1% | 48.2% | 51.8% | 50.0% | 40.7% | 47.4% | 53.5% |
| 2007                   | 59.7% | 46.0% | 57.0% | 51.1% | 47.1% | 45.8% | 50.4% |
| 2009                   | 63.0% | 46.6% | 48.8% | 49.6% | 42.9% | 43.9% | 46.4% |
| 2011                   | 55.7% | 49.0% | 49.4% | 49.8% | 42.8% | 42.9% | 47.9% |
| 2013                   | 61.1% | 54.3% | 47.0% | 50.3% | 42.8% | 46.4% | 46.8% |
| <hr/>                  |       |       |       |       |       |       |       |
| Low decision authority |       |       |       |       |       |       |       |
| 1991                   | 36.4% | 45.7% | 30.6% | 24.8% | 34.1% | 41.6% | 36.1% |
| 1993                   | 38.9% | 44.0% | 32.3% | 28.9% | 33.7% | 41.4% | 38.3% |
| 1995                   | 35.7% | 46.9% | 35.6% | 24.5% | 29.3% | 42.7% | 38.2% |
| 1997                   | 42.5% | 48.5% | 35.5% | 27.2% | 35.4% | 48.1% | 44.0% |
| 1999                   | 44.7% | 57.5% | 37.6% | 27.2% | 40.1% | 44.7% | 45.0% |
| 2001                   | 42.4% | 45.8% | 37.5% | 26.6% | 32.7% | 43.5% | 43.8% |
| 2003                   | 43.6% | 47.4% | 35.5% | 26.5% | 34.6% | 42.7% | 38.7% |
| 2005                   | 39.6% | 45.9% | 38.8% | 32.9% | 32.9% | 43.1% | 41.6% |
| 2007                   | 39.8% | 55.7% | 38.6% | 26.7% | 30.0% | 42.7% | 40.5% |
| 2009                   | 45.9% | 55.0% | 35.5% | 27.1% | 39.3% | 41.2% | 38.3% |
| 2011                   | 42.1% | 54.5% | 37.4% | 23.8% | 30.7% | 36.6% | 36.1% |

|                     | 2013 | 44.1% | 52.0% | 33.9% | 24.2% | 39.9% | 40.5% | 39.8% |
|---------------------|------|-------|-------|-------|-------|-------|-------|-------|
| Poor social support | 1991 | 46.0% | 38.6% | 42.2% | 46.5% | 43.1% | 43.5% | 44.0% |
|                     | 1993 | 47.9% | 40.6% | 46.1% | 45.3% | 40.4% | 44.4% | 50.5% |
|                     | 1995 | 46.4% | 42.2% | 47.2% | 47.3% | 38.9% | 41.6% | 48.1% |
|                     | 1997 | 49.0% | 42.1% | 43.9% | 38.2% | 36.0% | 43.2% | 47.1% |
|                     | 1999 | 51.4% | 42.9% | 41.7% | 40.3% | 39.3% | 41.9% | 48.9% |
|                     | 2001 | 49.4% | 42.9% | 41.7% | 45.2% | 43.9% | 46.4% | 49.1% |
|                     | 2003 | 46.1% | 38.4% | 45.2% | 40.6% | 38.5% | 44.1% | 43.9% |
|                     | 2005 | 49.0% | 44.1% | 49.0% | 48.3% | 40.4% | 46.9% | 51.4% |
|                     | 2007 | 43.8% | 42.2% | 44.2% | 40.1% | 37.6% | 43.9% | 44.9% |
|                     | 2009 | 41.4% | 39.7% | 42.0% | 40.3% | 39.6% | 40.3% | 45.7% |
|                     | 2011 | 42.7% | 42.0% | 39.0% | 36.2% | 38.2% | 38.4% | 45.9% |
|                     | 2013 | 44.6% | 39.5% | 36.8% | 36.3% | 36.9% | 43.4% | 48.0% |

**Legend:**

Edu: Education; HSC: Health and social care; LIS: Labour intensive services; KIS: Knowledge intensive services; PA: Public administration; GEP: Goods and energy production; MO: Machinery operations.

Female-dominated industries: Edu, HSC

Gender mixed industries: LIS, KIS; PA

Male-dominated industries: GEP, MO
